# Supplementary material for: Ectomycorrhizal fungal network complexity determines soil multi-enzymatic activity
Source: Copernicus journal article supplement (doi:10.5194/soil-10-425-2024), 2024-06-21
Supplement: Supplementary file 2 [file soil-10-425-2024-supplement.zip]

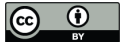

*Supplement of*

## **Ectomycorrhizal fungal network complexity determines soil multi-enzymatic activity**

**Jorge Prieto-Rubio et al.**

*Correspondence to:* Jorge Prieto-Rubio ([jorge.prieto@ext.uv.es](mailto:jorge.prieto@ext.uv.es))

- [soil-10-425-2024-supplement-title-page.pdf](#)
- [Supporting\\_Information - updated](#)
  - [Supporting\\_Information.pdf](#)
  - [Table S1.xlsx](#)
  - [Table S2.xlsx](#)
  - [Table S3.xlsx](#)

The copyright of individual parts of the supplement might differ from the article licence.
